# Supplementary material for: Importance of open, heteroatom-decorated edges in chemically doped-graphene for supercapacitor applications
Source: Royal Society of Chemistry journal article supplement (doi:10.1039/c4ta00936c), 2014-01-01
Supplement: c4ta00936c1.pdf [file c4ta00936c1.pdf]

Electronic Supplementary Information of

**Importance of Open, Heteroatom-Decorated Edges in Chemically-Doped-G  
raphenes for Supercapacitor Applications**

Kazunori Fujisawa<sup>1</sup>, Rodolfo Cruz-Silva<sup>2</sup>, Kap-Seung Yang<sup>3</sup>, Takuya Hayashi<sup>1</sup>, Yoong Ahm Kim<sup>3,\*</sup>, Morinobu Endo<sup>2</sup>, Mauricio Terrones<sup>2, 4</sup>, Mildred S. Dresselhaus<sup>5</sup>

<sup>1</sup>*Faculty of Engineering, Shinshu University, 4-17-1 Wakasato, Nagano 380-8553, Japan.*

<sup>2</sup>*Research Center for Exotic Nanocarbons (JST), Shinshu University, 4-17-1 Wakasato, Nagano 380-8553, Japan.*

<sup>3</sup>*School of Polymer Science and Engineering & Alan G. MacDiarmid Energy Research Institute, Chonnam National University, 77 Yongbong-ro, Buk-gu, Gwangju 500-757, Korea.*

<sup>4</sup>*Departments of Physics and of Materials Science and Engineering and Materials Research Institute, The Pennsylvania State University, 104 Davey Lab, University Park, Pennsylvania 16802-6300, USA.*

<sup>5</sup>*Massachusetts Institute of Technology, Cambridge, Massachusetts 02139-4307, USA*

\* Corresponding author: [yak@jnu.ac.kr](mailto:yak@jnu.ac.kr) Tel: +82-62-530-1871

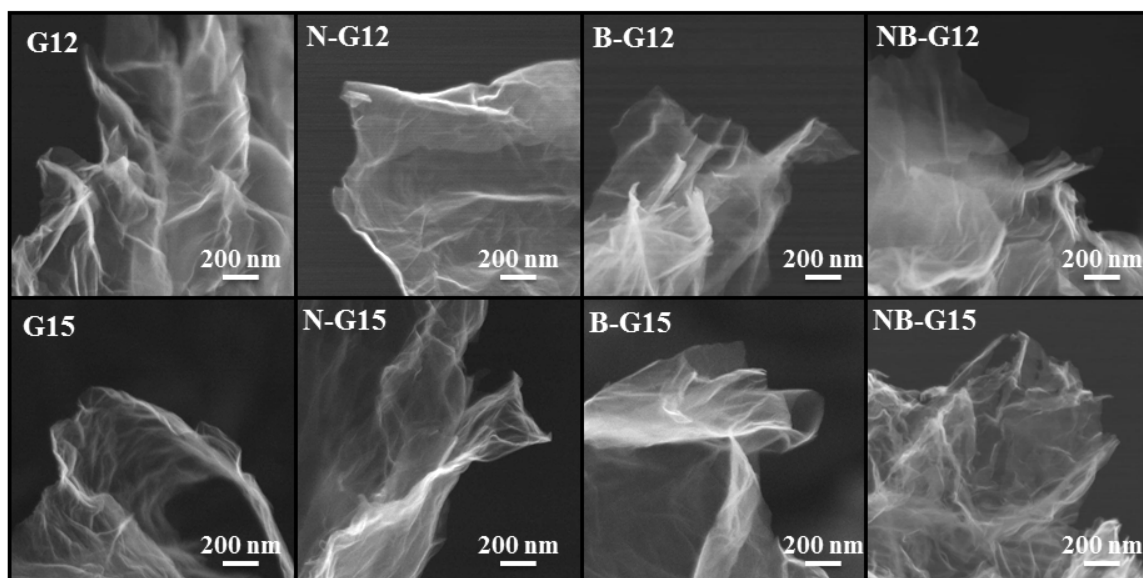

**Figure S1** FE-SEM images of undoped and heteroatom-doped graphenes. All graphene samples show a flat and sheet-like structure.

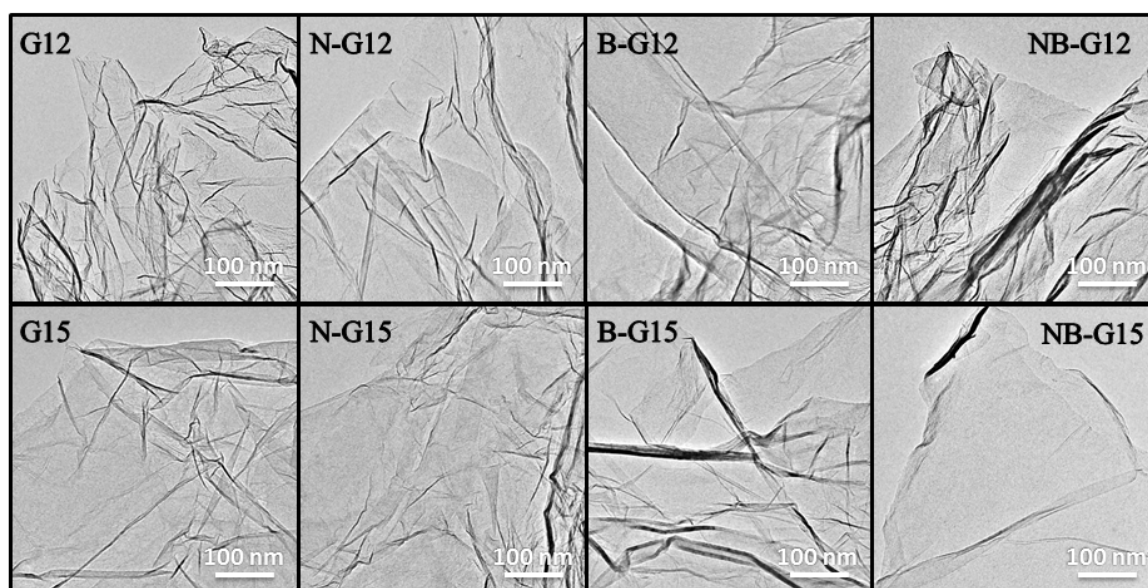

**Figure S2** Low magnification HR-TEM image of un-doped and doped graphenes. Both un-doped and doped graphenes show, bended, rippled and highly disordered structures. Note that no impurities were observed.

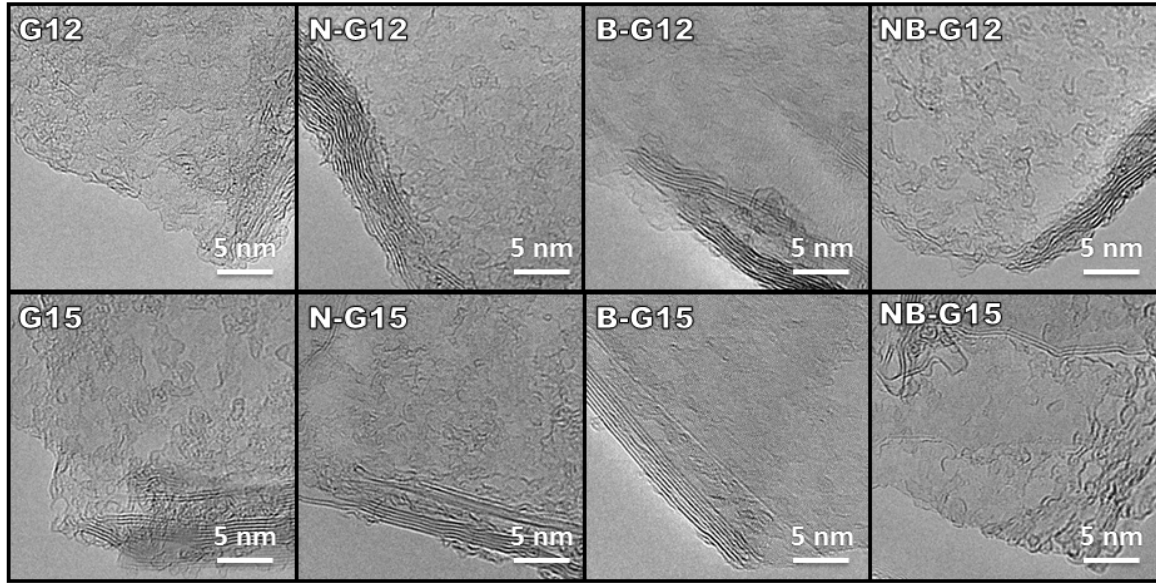

**Figure S3** High magnification HR-TEM image of un-doped and doped graphenes. Graphenes are partly multi-layered and the number of layers was estimated to be around 5-9.

**Table S1**  $R$  value and FWHM of the D-band for undoped and doped graphenes, evaluated from Raman spectra.

| Sample I.D. | HTT (°C) | Dopant | $R$ value ( $I_D/I_G$ ) <sup>a</sup> | FWHM (D-band) (cm <sup>-1</sup> ) |
|-------------|----------|--------|--------------------------------------|-----------------------------------|
| G12         | 1200     | -      | 1.38                                 | 85.8                              |
| B-G12       |          | B      | 1.25                                 | 97.5                              |
| N-G12       |          | N      | 1.22                                 | 103                               |
| NB-G12      |          | N-B    | 1.03                                 | 93.0                              |
| G15         | 1500     | -      | 0.99                                 | 93.7                              |
| B-G15       |          | B      | 0.89                                 | 73.9                              |
| N-G15       |          | N      | 1.11                                 | 82.6                              |
| NB-G15      |          | N-B    | 1.07                                 | 72.7                              |

<sup>a</sup> The  $R$  value ( $I_D/I_G$ ) is the integrated intensity of the D band divided by the integrated intensity of the G band.

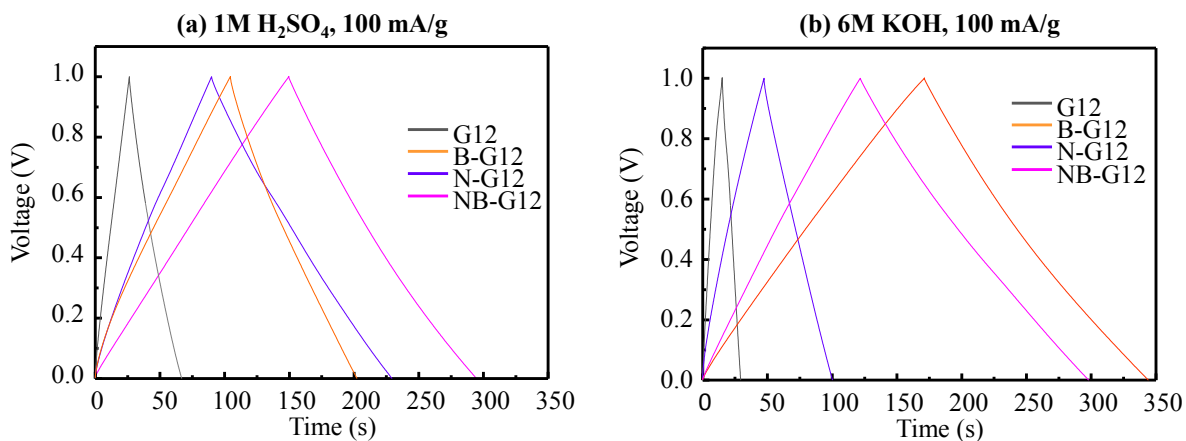

**Figure S4** Galvanostatic charge/discharge curves of un-doped and doped graphenes in (a) 1M  $\text{H}_2\text{SO}_4$  and (b) 6M KOH. Note that the current density is 100mA/g.

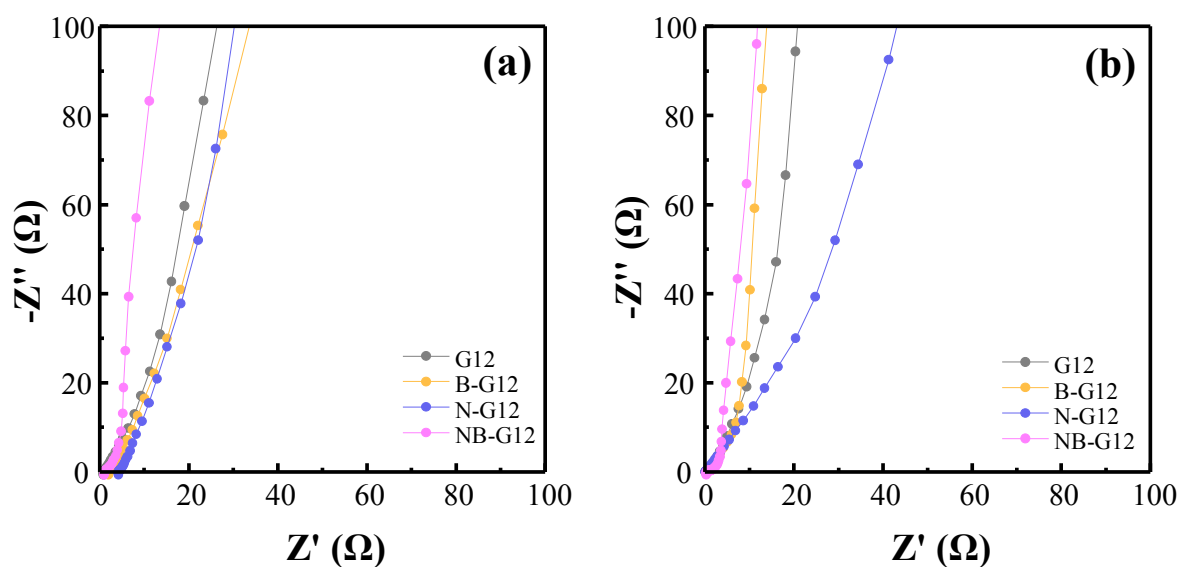

**Figure S5** Electrochemical Impedance spectroscopy results of un-doped and doped graphene in (a) 1M  $\text{H}_2\text{SO}_4$  and (b) 6M KOH.
